# Supplementary material for: Identification of the binding roles of terminal and internal glycan epitopes using enzymatically synthesized N-glycans containing tandem epitopes
Source: Royal Society of Chemistry journal article supplement (doi:10.1039/c6ob01982j), 2016-01-01
Supplement: c6ob01982j1.xlsx [file c6ob01982j1.xlsx]

## Sheet: MALI
MAL1
ChartID	Detail	Name	Average	STDEV	%CV
1	H5N4S2	BA-01	45.25	17.1731	37.9517
2	H5N4	BA-02	37.25	13.9374	37.4157
3	H5N4G2	BA-03	20.5	0.57735	2.81634
4	H5N4S2	BA-04	17100.2	427.093	2.49758
5	H5N4G2	BA-05	10330.5	108.997	1.0551
6	H5N4F2	BA-06	18.25	2.75379	15.0892
7	H7N4	BA-07	17	3.4641	20.3771
8	H7N4F2	BA-08	15.25	1.25831	8.25119
9	H5N4S4	BA-09	18	1.82574	10.143
10	H5N4S2G2	BA-10	13.5	1.91485	14.1841
11	H5N4G2S2	BA-11	14.5	1.91485	13.2059
12	H5N4G4	BA-12	9	2	22.2222
13	H5N4S4	BA-13	13823.2	1233.12	8.92059
14	H5N4S2G2	BA-14	17489.2	458.631	2.62236
15	H5N4G2S2	BA-15	19887.2	648.887	3.26283
16	H5N4G4	BA-16	20903.2	472.25	2.25922
17	H5N4F2S2	BA-17	8.25	0.5	6.06061
18	H5N4F2G2	BA-18	11	0.816497	7.4227
19	H7N6S2	BA-19	36827.2	1444.47	3.92227
20	H7N6G2	BA-20	31276	4587.9	14.6691
21	H7N6S4	BA-21	207	10.4243	5.03591
22	H7N6G4	BA-22	72.25	5.67891	7.86008
23	H7N6S4	BA-23	12462.2	493.888	3.96307
24	H7N6	BA-24	102	11.9722	11.7374
25	H9N8	BA-25	496.25	59.1122	11.9118
26	H9N6	BA-26	27.5	0.57735	2.09946
27	H11N8	BA-27	42.5	4.04145	9.5093
28	H7N6F2	BA-28	36.75	3.77492	10.2719
29	H7N6F2S2	BA-29	17504.5	241.133	1.37755
30	H7N6F4	BA-30	12	1.41421	11.7851
31	H9N6F2	BA-31	13.75	0.957427	6.96311
32	H9N6F4	BA-32	13	2.3094	17.7646
33	H9N8F4	BA-33	982	67.8135	6.90565
34	H9N8F6	BA-34	12.25	2.06155	16.829
35	H11N8F4	BA-35	11.75	6.39661	54.4393
36	H11N8F6	BA-36	8.75	1.25831	14.3806

## Sheet: SNA
SNA
ChartID	Detail	Name	Average	STDEV	%CV
1	H5N4S2	BA-01	12778.2	401.692	3.14356
2	H5N4	BA-02	90	18.9561	21.0623
3	H5N4G2	BA-03	19458.8	219.7	1.12906
4	H5N4S2	BA-04	44.25	7.8475	17.7345
5	H5N4G2	BA-05	61.25	35.7899	58.4325
6	H5N4F2	BA-06	37	29.6086	80.0231
7	H7N4	BA-07	52.25	5.37742	10.2917
8	H7N4F2	BA-08	40.25	17.557	43.62
9	H5N4S4	BA-09	30.75	6.29153	20.4603
10	H5N4S2G2	BA-10	26.25	5.25198	20.0076
11	H5N4G2S2	BA-11	37.25	5.37742	14.436
12	H5N4G4	BA-12	42.25	20.6458	48.8659
13	H5N4S4	BA-13	21.5	4.50925	20.9733
14	H5N4S2G2	BA-14	15.5	2.64575	17.0694
15	H5N4G2S2	BA-15	17.75	5.5	30.9859
16	H5N4G4	BA-16	28.25	8.53913	30.227
17	H5N4F2S2	BA-17	15	3.3665	22.4433
18	H5N4F2G2	BA-18	24	5.22813	21.7839
19	H7N6S2	BA-19	27.75	8.09835	29.1833
20	H7N6G2	BA-20	12	2.70801	22.5668
21	H7N6S4	BA-21	10764	150.933	1.4022
22	H7N6G4	BA-22	11855	231.855	1.95576
23	H7N6S4	BA-23	116.75	33.6291	28.8044
24	H7N6	BA-24	65.75	15.1959	23.1117
25	H9N8	BA-25	83	7.70281	9.2805
26	H9N6	BA-26	62.5	17.2916	27.6666
27	H11N8	BA-27	83.75	15.5858	18.6099
28	H7N6F2	BA-28	12	1.41421	11.7851
29	H7N6F2S2	BA-29	28	8.04156	28.7199
30	H7N6F4	BA-30	17.25	2.21736	12.8542
31	H9N6F2	BA-31	25.25	3.77492	14.9502
32	H9N6F4	BA-32	32.5	10.0167	30.8205
33	H9N8F4	BA-33	16.75	1.70783	10.196
34	H9N8F6	BA-34	22.75	1.5	6.59341
35	H11N8F4	BA-35	21	2.94392	14.0187
36	H11N8F6	BA-36	22.25	8.88351	39.9259

## Sheet: ECL
ECL
ChartID	Detail	Name	Average	STDEV	%CV
1	H5N4S2	BA-01	14.25	0.5	3.50877
2	H5N4	BA-02	65075.5	542.337	0.833396
3	H5N4G2	BA-03	8.25	1.25831	15.2522
4	H5N4S2	BA-04	9.25	0.957427	10.3506
5	H5N4G2	BA-05	7.25	0.5	6.89655
6	H5N4F2	BA-06	6.75	0.5	7.40741
7	H7N4	BA-07	8.25	1.70783	20.7009
8	H7N4F2	BA-08	6.75	1.25831	18.6416
9	H5N4S4	BA-09	8	1.82574	22.8218
10	H5N4S2G2	BA-10	6.75	0.5	7.40741
11	H5N4G2S2	BA-11	6.75	2.21736	32.8497
12	H5N4G4	BA-12	6	1.82574	30.429
13	H5N4S4	BA-13	7.75	2.62996	33.9349
14	H5N4S2G2	BA-14	7	2.44949	34.9927
15	H5N4G2S2	BA-15	7.5	3.10913	41.455
16	H5N4G4	BA-16	7	3.16228	45.1754
17	H5N4F2S2	BA-17	12	4.39697	36.6414
18	H5N4F2G2	BA-18	6.75	2.62996	38.9623
19	H7N6S2	BA-19	6.5	1.91485	29.4593
20	H7N6G2	BA-20	8	2.44949	30.6186
21	H7N6S4	BA-21	10	2.94392	29.4392
22	H7N6G4	BA-22	9.5	0.57735	6.07737
23	H7N6S4	BA-23	9.5	0.57735	6.07737
24	H7N6	BA-24	64633.2	117.571	0.181905
25	H9N8	BA-25	62518.8	561.267	0.897758
26	H9N6	BA-26	14.75	4.42531	30.0021
27	H11N8	BA-27	15.75	4.5	28.5714
28	H7N6F2	BA-28	61814.8	1557.6	2.51979
29	H7N6F2S2	BA-29	1347.75	40.5822	3.01111
30	H7N6F4	BA-30	10.25	2.06155	20.1127
31	H9N6F2	BA-31	14.75	2.21736	15.0329
32	H9N6F4	BA-32	15.25	1.89297	12.4129
33	H9N8F4	BA-33	61332.8	572.405	0.933278
34	H9N8F6	BA-34	9	1.1547	12.83
35	H11N8F4	BA-35	20.75	6.65207	32.0582
36	H11N8F6	BA-36	18	8.7178	48.4322

## Sheet: GSL-I-B4
GSL-I-B4
ChartID	Detail	Name	Average	STDEV	%CV
1	H5N4S2	BA-01	16.75	0.957427	5.71598
2	H5N4	BA-02	13.5	3.78594	28.044
3	H5N4G2	BA-03	13	1.63299	12.5615
4	H5N4S2	BA-04	10.5	1.29099	12.2952
5	H5N4G2	BA-05	12	0.816497	6.80414
6	H5N4F2	BA-06	13.25	1.25831	9.49665
7	H7N4	BA-07	59632.5	3079.91	5.16481
8	H7N4F2	BA-08	60355.5	1658.73	2.74826
9	H5N4S4	BA-09	12.5	2.08167	16.6533
10	H5N4S2G2	BA-10	11.25	0.5	4.44444
11	H5N4G2S2	BA-11	12	1.63299	13.6083
12	H5N4G4	BA-12	10	0	0
13	H5N4S4	BA-13	10.5	0.57735	5.49857
14	H5N4S2G2	BA-14	9.5	1.29099	13.5894
15	H5N4G2S2	BA-15	10	1.41421	14.1421
16	H5N4G4	BA-16	10	0.816497	8.16497
17	H5N4F2S2	BA-17	11.25	0.5	4.44444
18	H5N4F2G2	BA-18	9.25	0.957427	10.3506
19	H7N6S2	BA-19	10	0	0
20	H7N6G2	BA-20	8.75	0.957427	10.942
21	H7N6S4	BA-21	13.25	2.98608	22.5364
22	H7N6G4	BA-22	10	0.816497	8.16497
23	H7N6S4	BA-23	10.5	1.29099	12.2952
24	H7N6	BA-24	10	1.41421	14.1421
25	H9N8	BA-25	9.75	0.957427	9.81977
26	H9N6	BA-26	58661	1977.69	3.3714
27	H11N8	BA-27	58140.2	334.913	0.576044
28	H7N6F2	BA-28	9.25	0.5	5.40541
29	H7N6F2S2	BA-29	9.25	1.25831	13.6033
30	H7N6F4	BA-30	9.75	0.957427	9.81977
31	H9N6F2	BA-31	38623.8	4559.64	11.8053
32	H9N6F4	BA-32	62679.5	1608.08	2.56555
33	H9N8F4	BA-33	8.75	1.25831	14.3806
34	H9N8F6	BA-34	9.5	0.57735	6.07737
35	H11N8F4	BA-35	9293	664.18	7.1471
36	H11N8F6	BA-36	37891.8	1252.85	3.3064

## Sheet: WGA-0.5ug
WGA 0.5 mg/ml
ChartID	Detail	Name	Average	STDEV	%CV
1	H5N4S2	BA-01	2	2.16025	108.012
2	H5N4	BA-02	4.75	0.957427	20.1564
3	H5N4G2	BA-03	10.25	2.62996	25.6581
4	H5N4S2	BA-04	19686	1823.51	9.26298
5	H5N4G2	BA-05	29	30.3425	104.629
6	H5N4F2	BA-06	19.75	12.5797	63.6949
7	H7N4	BA-07	78	58.6686	75.2161
8	H7N4F2	BA-08	36.75	31.6373	86.0878
9	H5N4S4	BA-09	13	6.68331	51.4101
10	H5N4S2G2	BA-10	8.25	0.5	6.06061
11	H5N4G2S2	BA-11	8.25	1.5	18.1818
12	H5N4G4	BA-12	21.5	28.3373	131.801
13	H5N4S4	BA-13	13.25	3.59398	27.1244
14	H5N4S2G2	BA-14	6.5	0.57735	8.88231
15	H5N4G2S2	BA-15	10.75	1.70783	15.8867
16	H5N4G4	BA-16	6.75	0.5	7.40741
17	H5N4F2S2	BA-17	12623.8	930.219	7.3688
18	H5N4F2G2	BA-18	7.5	0.57735	7.698
19	H7N6S2	BA-19	60524.2	615.687	1.01726
20	H7N6G2	BA-20	9	1.82574	20.286
21	H7N6S4	BA-21	50.25	35.2266	70.1028
22	H7N6G4	BA-22	42	33.2966	79.2777
23	H7N6S4	BA-23	3839	231.315	6.0254
24	H7N6	BA-24	1561.75	322.498	20.6498
25	H9N8	BA-25	5416.75	423.261	7.81394
26	H9N6	BA-26	1227	662.47	53.991
27	H11N8	BA-27	19095	1050.88	5.50341
28	H7N6F2	BA-28	86.75	49.3043	56.835
29	H7N6F2S2	BA-29	19943.2	385.563	1.9333
30	H7N6F4	BA-30	10	0.816497	8.16497
31	H9N6F2	BA-31	264.75	291.813	110.222
32	H9N6F4	BA-32	86.25	53.6182	62.1661
33	H9N8F4	BA-33	211.75	59.9521	28.3127
34	H9N8F6	BA-34	34.25	22.4852	65.6502
35	H11N8F4	BA-35	78.75	45.0361	57.1887
36	H11N8F6	BA-36	15.75	6.13052	38.924

## Sheet: WGA-2ug 
WGA 2 mg/ml
ChartID	Detail	Name	Average	STDEV	%CV
1	H5N4S2	BA-01	59.5	41.4447	69.655
2	H5N4	BA-02	15963	1693.02	10.6059
3	H5N4G2	BA-03	18.25	17.2506	94.5239
4	H5N4S2	BA-04	60188.5	1459.58	2.42501
5	H5N4G2	BA-05	31.25	21.3912	68.4518
6	H5N4F2	BA-06	472	187.965	39.823
7	H7N4	BA-07	48658	3685.04	7.57336
8	H7N4F2	BA-08	520.5	536.186	103.014
9	H5N4S4	BA-09	12	3.55903	29.6586
10	H5N4S2G2	BA-10	7.5	1.29099	17.2133
11	H5N4G2S2	BA-11	12	1.82574	15.2145
12	H5N4G4	BA-12	10.25	0.957427	9.34075
13	H5N4S4	BA-13	42.25	2.87228	6.7983
14	H5N4S2G2	BA-14	7.75	1.5	19.3548
15	H5N4G2S2	BA-15	901.25	68.1634	7.56321
16	H5N4G4	BA-16	36.25	54.5061	150.362
17	H5N4F2S2	BA-17	46452.2	2053.19	4.42001
18	H5N4F2G2	BA-18	10	1.63299	16.3299
19	H7N6S2	BA-19	62713.2	728.277	1.16128
20	H7N6G2	BA-20	496.5	310.001	62.4372
21	H7N6S4	BA-21	14	9.05539	64.6813
22	H7N6G4	BA-22	36.25	46.7003	128.828
23	H7N6S4	BA-23	29415.5	4647.89	15.8008
24	H7N6	BA-24	60877	230.193	0.378127
25	H9N8	BA-25	64746	656.866	1.01453
26	H9N6	BA-26	60501.2	593.449	0.980887
27	H11N8	BA-27	65019.2	132.515	0.203809
28	H7N6F2	BA-28	2393	618.723	25.8556
29	H7N6F2S2	BA-29	58610	1097.29	1.87219
30	H7N6F4	BA-30	680.75	561.16	82.4327
31	H9N6F2	BA-31	4343	642.539	14.7948
32	H9N6F4	BA-32	599.75	192.292	32.062
33	H9N8F4	BA-33	1002	613.505	61.2281
34	H9N8F6	BA-34	37.75	45.5878	120.762
35	H11N8F4	BA-35	1143.25	389.411	34.0618
36	H11N8F6	BA-36	80.25	38.5692	48.0613

## Sheet: WGA-5ug
WGA 5 mg/ml
ChartID	Detail	Name	Average	STDEV	%CV
1	H5N4S2	BA-01	122.25	57.5058	47.0395
2	H5N4	BA-02	55801.5	4498.7	8.06196
3	H5N4G2	BA-03	43	19.6129	45.6114
4	H5N4S2	BA-04	62511	441.358	0.706048
5	H5N4G2	BA-05	14908.8	3955.95	26.5344
6	H5N4F2	BA-06	5729.75	1175.09	20.5086
7	H7N4	BA-07	58337.5	430.656	0.738214
8	H7N4F2	BA-08	4996.25	289.498	5.7943
9	H5N4S4	BA-09	26.25	2.5	9.52381
10	H5N4S2G2	BA-10	9.75	0.957427	9.81977
11	H5N4G2S2	BA-11	27.25	7.27438	26.695
12	H5N4G4	BA-12	9	0.816497	9.07218
13	H5N4S4	BA-13	3457.75	193.679	5.6013
14	H5N4S2G2	BA-14	68.25	65.0199	95.2672
15	H5N4G2S2	BA-15	48166	1822.43	3.78364
16	H5N4G4	BA-16	11	0	0
17	H5N4F2S2	BA-17	48473.8	2106.24	4.34512
18	H5N4F2G2	BA-18	44	33.4365	75.9921
19	H7N6S2	BA-19	60409.8	674.161	1.11598
20	H7N6G2	BA-20	31370.8	774.123	2.46766
21	H7N6S4	BA-21	84.25	30.7828	36.5375
22	H7N6G4	BA-22	78.25	39.1354	50.0134
23	H7N6S4	BA-23	54026.5	1001.04	1.85287
24	H7N6	BA-24	61894.8	1328.31	2.14607
25	H9N8	BA-25	64186	623.561	0.971491
26	H9N6	BA-26	65339.5	152.194	0.232928
27	H11N8	BA-27	63327.2	1361.64	2.15016
28	H7N6F2	BA-28	21709	705.332	3.24903
29	H7N6F2S2	BA-29	59936.2	825.336	1.37702
30	H7N6F4	BA-30	2660.75	474.943	17.85
31	H9N6F2	BA-31	41613.5	2004.92	4.81795
32	H9N6F4	BA-32	1697.25	218.353	12.8651
33	H9N8F4	BA-33	10968.2	821.835	7.49285
34	H9N8F6	BA-34	315.75	236.663	74.9528
35	H11N8F4	BA-35	20248.2	1483.82	7.32815
36	H11N8F6	BA-36	525.5	276.22	52.5633

## Sheet: WGA-10ug
WGA 10 mg/ml
ChartID	Detail	Name	Average	STDEV	%CV
1	H5N4S2	BA-01	499.75	141.855	28.3852
2	H5N4	BA-02	57348.5	2904	5.06378
3	H5N4G2	BA-03	44.75	14.4078	32.1961
4	H5N4S2	BA-04	64611.2	362.945	0.561736
5	H5N4G2	BA-05	63725	890.153	1.39687
6	H5N4F2	BA-06	21320.5	5280.4	24.7668
7	H7N4	BA-07	61657.5	635.103	1.03005
8	H7N4F2	BA-08	20244	478.973	2.366
9	H5N4S4	BA-09	147.5	128.946	87.4208
10	H5N4S2G2	BA-10	12.75	0.957427	7.50923
11	H5N4G2S2	BA-11	98.25	13.8894	14.1368
12	H5N4G4	BA-12	13	0.816497	6.28074
13	H5N4S4	BA-13	30118.8	752.913	2.49982
14	H5N4S2G2	BA-14	150.75	190.851	126.601
15	H5N4G2S2	BA-15	62202.5	678.06	1.09009
16	H5N4G4	BA-16	15	1.82574	12.1716
17	H5N4F2S2	BA-17	59681.8	1174.77	1.96839
18	H5N4F2G2	BA-18	135.25	4.19325	3.10037
19	H7N6S2	BA-19	62432.8	1360.21	2.17868
20	H7N6G2	BA-20	52980.2	3196.46	6.03331
21	H7N6S4	BA-21	102.5	63.0687	61.5305
22	H7N6G4	BA-22	74.5	19.485	26.1544
23	H7N6S4	BA-23	53417.8	760.726	1.42411
24	H7N6	BA-24	61382.5	459.227	0.74814
25	H9N8	BA-25	60192.8	344.539	0.572392
26	H9N6	BA-26	63309	630.743	0.996293
27	H11N8	BA-27	63750.2	750.636	1.17746
28	H7N6F2	BA-28	43355.5	1394.51	3.21646
29	H7N6F2S2	BA-29	60830.2	264.611	0.434999
30	H7N6F4	BA-30	13970	760.321	5.44252
31	H9N6F2	BA-31	55427	617.942	1.11488
32	H9N6F4	BA-32	9112	479.931	5.26702
33	H9N8F4	BA-33	27648.5	492.021	1.77956
34	H9N8F6	BA-34	1391.25	306.425	22.0252
35	H11N8F4	BA-35	37310.8	982.519	2.63334
36	H11N8F6	BA-36	1071	224.777	20.9876

## Sheet: Anti CD15 
Anti CD15
ChartID	Detail	Name	Average	STDEV	%CV
1	H5N4S2	BA-01	3.685	2.48114	67.3307
2	H5N4	BA-02	47.92	61.5905	128.528
3	H5N4G2	BA-03	19.7975	9.22881	46.6161
4	H5N4S2	BA-04	14.765	3.3655	22.7937
5	H5N4G2	BA-05	8.85	3.88313	43.8771
6	H5N4F2	BA-06	8.18	3.03697	37.1268
7	H7N4	BA-07	13.5125	1.98515	14.6912
8	H7N4F2	BA-08	46.04	69.4185	150.779
9	H5N4S4	BA-09	5.81	0.609098	10.4836
10	H5N4S2G2	BA-10	9.1725	2.07479	22.6197
11	H5N4G2S2	BA-11	6.17	1.99006	32.2538
12	H5N4G4	BA-12	8.4925	2.42702	28.5784
13	H5N4S4	BA-13	6.69	2.48646	37.1668
14	H5N4S2G2	BA-14	7.74	3.91682	50.6049
15	H5N4G2S2	BA-15	7.2525	1.71148	23.5985
16	H5N4G4	BA-16	7.54	2.6553	35.2161
17	H5N4F2S2	BA-17	7.34	2.58408	35.2054
18	H5N4F2G2	BA-18	6.8775	0.890183	12.9434
19	H7N6S2	BA-19	8.3925	1.25165	14.9139
20	H7N6G2	BA-20	8.275	2.19517	26.5277
21	H7N6S4	BA-21	8.225	1.01786	12.3752
22	H7N6G4	BA-22	7.335	0.701546	9.56436
23	H7N6S4	BA-23	6.175	0.998081	16.1633
24	H7N6	BA-24	12.4475	6.37915	51.2484
25	H9N8	BA-25	53.0125	73.7584	139.134
26	H9N6	BA-26	31.345	41.1539	131.293
27	H11N8	BA-27	12.3	2.84062	23.0945
28	H7N6F2	BA-28	7.01	1.19931	17.1085
29	H7N6F2S2	BA-29	5.75	1.15534	20.0928
30	H7N6F4	BA-30	58325.1	494.972	0.848643
31	H9N6F2	BA-31	10.6575	2.72072	25.5286
32	H9N6F4	BA-32	15.77	2.36411	14.9912
33	H9N8F4	BA-33	13.265	8.10062	61.0676
34	H9N8F6	BA-34	64239.6	454.054	0.706814
35	H11N8F4	BA-35	6.0225	2.12115	35.2205
36	H11N8F6	BA-36	7.525	1.16145	15.4346

## Sheet: Anti CD15s
Anti CD15s
ChartID	Detail	Name	Average	STDEV	%CV
1	H5N4S2	BA-01	66.75	15.0859	22.6005
2	H5N4	BA-02	95	32.4037	34.1092
3	H5N4G2	BA-03	60	7.61577	12.693
4	H5N4S2	BA-04	91	66.0656	72.5996
5	H5N4G2	BA-05	50	7.07107	14.1421
6	H5N4F2	BA-06	38.75	3.86221	9.96699
7	H7N4	BA-07	48.25	4.34933	9.01415
8	H7N4F2	BA-08	37.5	19.4165	51.7773
9	H5N4S4	BA-09	46.25	13.326	28.8131
10	H5N4S2G2	BA-10	59.75	10.7199	17.9413
11	H5N4G2S2	BA-11	57.5	8.69866	15.1281
12	H5N4G4	BA-12	42	16.3095	38.8322
13	H5N4S4	BA-13	52	3.26599	6.28074
14	H5N4S2G2	BA-14	40.75	2.62996	6.45388
15	H5N4G2S2	BA-15	37	8.04156	21.7339
16	H5N4G4	BA-16	55.25	20.0728	36.3308
17	H5N4F2S2	BA-17	76	15.5563	20.4689
18	H5N4F2G2	BA-18	57.5	10.3441	17.9897
19	H7N6S2	BA-19	59.25	12.6853	21.4098
20	H7N6G2	BA-20	37	8.28654	22.396
21	H7N6S4	BA-21	3833.75	298.179	7.77775
22	H7N6G4	BA-22	57	15.8114	27.7393
23	H7N6S4	BA-23	51	13.2162	25.914
24	H7N6	BA-24	46.25	9.21502	19.9244
25	H9N8	BA-25	39.25	23.6555	60.2688
26	H9N6	BA-26	92	41.0609	44.6314
27	H11N8	BA-27	31.5	14.5488	46.1866
28	H7N6F2	BA-28	30	7.02377	23.4126
29	H7N6F2S2	BA-29	37.75	18.6971	49.5289
30	H7N6F4	BA-30	59	22.9056	38.8231
31	H9N6F2	BA-31	97.25	21.1877	21.7868
32	H9N6F4	BA-32	59.5	34.8473	58.5669
33	H9N8F4	BA-33	69.25	13.8414	19.9875
34	H9N8F6	BA-34	52.5	11.1206	21.182
35	H11N8F4	BA-35	46.25	13.7447	29.7183
36	H11N8F6	BA-36	41.75	15.1079	36.1867

[truncated: 3 more sheets: Swine, Avian, Human]
